# Supplementary material for: Boronic Acid Transition State Inhibitors as Potent Inactivators of KPC and CTX-M β-Lactamases: Biochemical and Structural Analyses
Source: PubMed Central journal article supplement (PMC9872677; doi:10.1128/aac.00930-22), 2023-01-05
Supplement: aac.00930-22-s0001.pdf [file aac.00930-22-s0001.pdf]

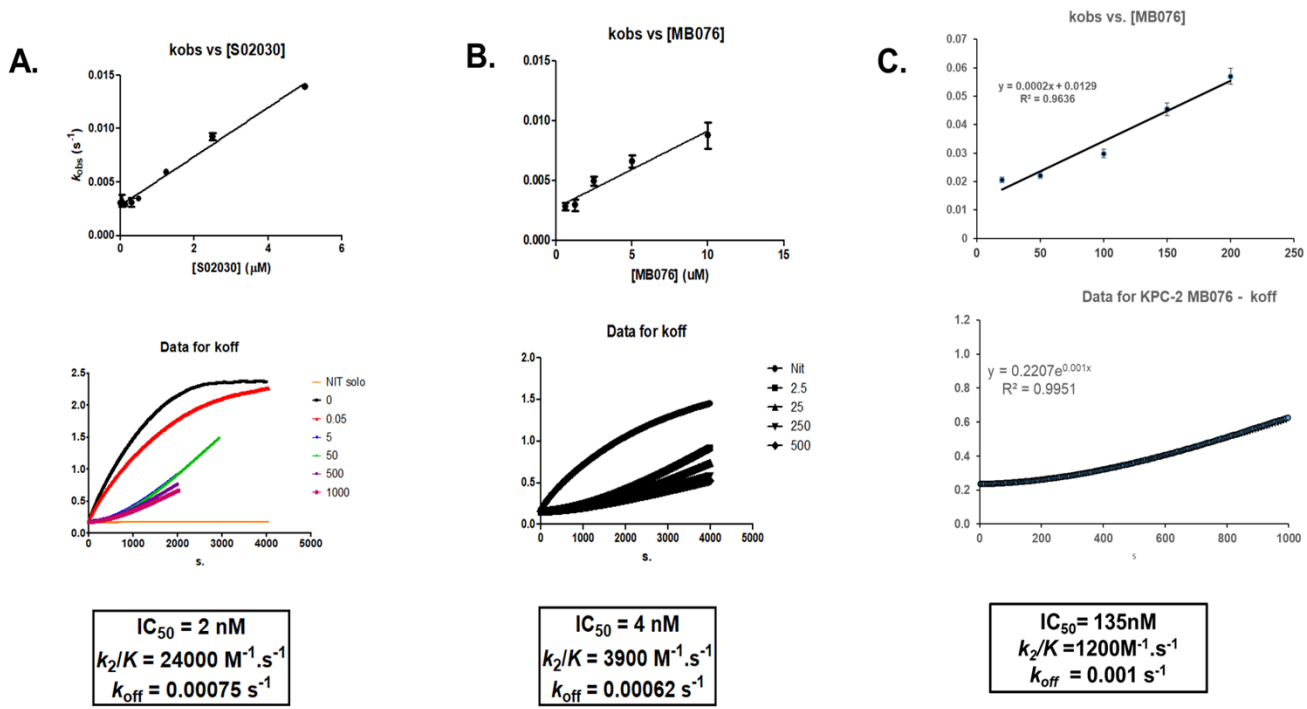

**Figure S1.** (A) CTX-M-96 S02030, (B) CTX-M-96 MB\_076 and (C) KPC-2 and MB\_076 kinetics.
